# Supplementary material for: Leeuwin Current dynamics over the last 60 kyr – relation to Australian ecosystem and Southern Ocean change
Source: Copernicus journal article supplement (doi:10.5194/cp-18-2483-2022), 2022-11-15
Supplement: Supplementary file 1 [file cp-18-2483-2022-supplement.pdf]

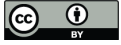

*Supplement of*

## **Leeuwin Current dynamics over the last 60 kyr – relation to Australian ecosystem and Southern Ocean change**

**Dirk Nürnberg et al.**

*Correspondence to:* Dirk Nürnberg ([dnuernberg@geomar.de](mailto:dnuernberg@geomar.de))

The copyright of individual parts of the supplement might differ from the article licence.

1  
2  
3  
4  
5  
6  
7  
8  
9  
10  
11  
12  
13  
14  
15  
16  
17  
18  
19  
20  
21  
22  
23  
24  
25

**Introduction**

The Supplement includes text passages, figures, and data tables supporting the abovementioned study. The text discusses in higher detail the ecology of the selected foraminiferal species, and diverse aspects relevant to the Mg/Ca-paleothermometry.

1. **Text S1** Supporting information on foraminiferal species selected and their ecology, analytical details and error assessment for foraminiferal Mg/Ca, contamination and calcite dissolution issues, chronostratigraphy, and references.
2. **Figure S1.** Contamination plots (core 2614)
3. **Figure S2.** Contamination plots (core 2609)
4. **Figure S3.** Downcore Mg/Ca<sub>O.universa</sub> of core 2614
5. **Figure S4.** Downcore Mg/Ca<sub>O.universa</sub> of core 2609
6. **Figure S5.** Downcore Mg/Ca<sub>G.trunca</sub> of core 2609
7. **Figure S6.** Analytical results for western core 2614
8. **Figure S7.** Analytical results for eastern core 2609
9. **Figure S8.** Calculated Mg/Ca-based temperatures from western core 2614
10. **Figure S9.** Calculated Mg/Ca-based temperatures from eastern core 2609
11. **Figure S10.** Differently calculated SST records
12. **Figure S11.** ph-corrected SST<sub>Mg/Ca</sub> records (MgCaRB)
13. **Table S1.** Defined outliers
14. **Table S2.** Assessment of ph-effect on Mg/Ca: MgCaRB input parameters
15. **Table S3.** Radiocarbon datings

26 **Text S1** Supporting information on foraminiferal species selected and their ecology, analytical  
27 details and error assessment for foraminiferal Mg/Ca, contamination and calcite dissolution  
28 issues, chronostratigraphy, and references.

29

30 *Ecology, calcification depths, and seasonality of proxy formation*

31 Planktonic foraminifera are marine protists living in the photic zone. They produce calcitic  
32 tests from calcium carbonate from the surrounding water. To reconstruct surface ocean  
33 conditions, we selected the near-surface species *Orbulina universa* (d'Orbigny, 1839).  
34 *O. universa* is a spinose planktonic foraminiferal species that inhabits surface waters  
35 throughout the tropical, subtropical and transition zones of the world ocean (Bé and  
36 Tolderlund, 1971). Early studies of their habitat preferences and morphology regard their  
37 morphotypes as belonging to the same genetic species, but showing phenotypic variations  
38 under different environmental conditions (Bé et al., 1973; Hecht et al., 1976; Colombo and  
39 Cita, 1980). These studies reveal that *O. universa* has a preference for dwelling within the  
40 photic zone between the surface mixed layer and the shallow thermocline, which is ~30-80 m  
41 water depth in our study areas (c.f. Fig. 2). *O. universa* has a 2-staged growth in their life cycle  
42 (Caron et al., 1987; Lea et al., 1995). In the juvenile stage, they build a multi-chambered  
43 trochospiral form covered with calcite spines. In the adult stage, they develop a final, large,  
44 spherical chamber that hosts 90-95 % of its total calcite (Spero and Parker, 1985). The final  
45 chamber continues to thicken until gametogenesis, during which their spines are shed  
46 (Hamilton et al., 2008).

47 Based on sediment trap studies, Deuser et al. (1981) proposed different calcification depths for  
48 different morphotypes of *O. universa*: thin-walled (5-10  $\mu\text{m}$ ) and thick-walled (up to 30  $\mu\text{m}$ )  
49 morphotypes, with the thick-walled morphotypes secreting shells having ~0.5 ‰ higher  $\delta^{18}\text{O}$   
50 than the thin-walled variants. Marshall et al. (2015) pointed out that the different isotopic  
51 compositions of both morphotypes cannot be explained by seasonal variation, as they are both  
52 present year-round. For this study, we made no distinction between morphotypes, as both  
53 morphotypes of *O. universa* show resembling calcification depths (Anand et al., 2003; Farmer  
54 et al., 2007). The issue of a seasonal bias of proxies generated on *O. universa* is discussed  
55 further below.

56 To support the *O. universa* analytical results, we additionally analyzed *Globigerinoides ruber*  
57 white, which is a symbiont-bearing near surface dwelling species, living in the upper 50 m of  
58 the mixed layer (Bé and Hutson, 1977). It occurs in warmer regions, predominantly in  
59 subtropical regions. Several studies confirmed that *G. ruber* records reflect warmest water

60 conditions of the seasonal cycle (Regenberg, et al., 2009). Andrijanic (1988) showed  
61 omnipresent *G. ruber* in austral summer off the eastern Australian coast. We presume that  
62 *G. ruber* did not change habitat significantly over time, as it is a very shallow dwelling,  
63 symbiont-bearing species dependent on high light levels.

64 To reconstruct subsurface ocean properties, we selected calcitic tests of the planktonic  
65 foraminiferal species *Globorotalia truncatulinoides* (d'Orbigny, 1839). *G. truncatulinoides* is  
66 a deep-dwelling planktonic, subtropical species, which occurs over a broad range of water  
67 temperatures and salinities (e.g., Lohmann and Schweitzer, 1990; Ganssen and Kroon, 2000).  
68 For *G. truncatulinoides*, a coiling dimorphism is apparent, separating the species into left-  
69 coiled (sinistral) and right-coiled (dextral) morphotypes. The preferred habitats of both  
70 morphotypes, however, are rather similar (Jentzen et al., 2018; Cl  roux et al., 2008). Friedrich  
71 et al. (2012) and Ganssen and Kroon (2000) found that both morphotypes have similar stable  
72 oxygen ( $\delta^{18}\text{O}$ ) and carbon isotope ( $\delta^{13}\text{C}$ ) compositions, and Mg/Ca signatures. We therefore  
73 made no distinctions between morphotypes.

74 *G. truncatulinoides* exhibits a complex life cycle, beginning in the upper meters of the water  
75 column in the photic zone. It continues to grow and calcify new chambers in deeper waters  
76 until it reaches the adult stage, thereby pursuing a reproductive strategy that requires annual  
77 vertical migration of several hundred meters, with greater living depths during spring and  
78 summer (Cl  roux et al., 2009). Different encrustation stages of *G. truncatulinoides*, in this  
79 respect, may point to different calcification depths (Reynolds et al., 2018). In the Gulf of  
80 Mexico, non-encrusted and encrusted specimens reveal mean calcification depths of  $66 \pm 9$  m  
81 (with a range between 0-150 m) and  $379 \pm 76$  m (with a range between 170 and 700 m),  
82 respectively (Reynolds et al., 2018). As the majority of the *G. truncatulinoides* specimens in  
83 cores 2614 and 2609 are encrusted, we assume a rather deep habitat depth range.

84 Various studies reported that a higher abundance of *G. truncatulinoides* is associated with a  
85 very deep (permanent) thermocline and/or thick water thermostads (Lohmann and Schweitzer,  
86 1990; Ravelo and Fairbanks, 1992; McKenna and Prell, 2004; Schiebel and Hemleben, 2005).  
87 In Tobago basin (tropical W-Atlantic), N  rnberg et al. (2021) assigned a calcification depth of  
88  $\sim 200\text{-}250$  m to *G. truncatulinoides*, which corresponds to a depth nearly below the main  
89 thermocline in this area. This notion is in good agreement with findings from the eastern  
90 Caribbean, where *G. truncatulinoides* apparently prefers a habitat at  $\sim 180\text{-}300$  m (Jentzen et  
91 al., 2018). Cl  roux et al. (2008) proposed that at mid-latitudes and high latitudes, the isotopic  
92 temperature of *G. truncatulinoides* exceeds winter temperatures, but coincide with summer  
93 temperatures around the base of the summer thermocline. In our study area, the base of the

94 summer thermocline is between ~350 and 400 m (Fig. 2), which is rather deep compared to  
95 other ocean areas.

96 Jonkers and Kučera (2015) projected that the flux pattern of the deep-dwelling  
97 *G. truncatulinoides* is rather regular over the year, with a high percentage of the annual flux  
98 occurring in a single high-flux pulse. For our derived subSST<sub>Mg/Ca</sub> records we reckon that the  
99 seasonal range at the base of the thermocline is minimal (Fig. 2), hence a seasonal bias for the  
100 proxy records, if any, is minimal.

101

### 102 *Sample contamination*

103 Marine sediment contains a significant proportion of clay (~1-10 % Mg by weight), which may  
104 perturb the foraminiferal Mg/Ca ratios, when tests are not cautiously cleaned prior to the  
105 analyses. By monitoring the foraminiferal samples for their Fe/Ca, Al/Ca and Mn/Ca ratios,  
106 the effect of cleaning efficiency, post depositional contamination, and diagenetic alteration on  
107 foraminiferal Mg/Ca was examined. Barker et al. (2003) and Them et al. (2015) proposed  
108 contamination-indicative threshold values for Fe/Ca, Al/Ca and Mn/Ca (<0.1 mmol mol<sup>-1</sup>).  
109 Meanwhile, numerous studies have shown that these threshold values - defined in the North  
110 Atlantic - are often exceeded as they largely depend on the sediment type the foraminiferal  
111 tests were removed from (e.g. Nürnberg et al., 2021).

112 In many of our foraminiferal samples, the Al/Ca, Fe/Ca and Mn/Ca ratios are higher than the  
113 given threshold values, and at times reach values of up to ~0.7 mmol mol<sup>-1</sup>, ~0.5 mmol mol<sup>-1</sup>,  
114 and ~0.007 mmol mol<sup>-1</sup>, respectively (Fig. S1; S2). Notably, these high contaminant values do  
115 not consistently have extremely high foraminiferal Mg/Ca ratios. Also, the correlation of  
116 Mg/Ca<sub>*O.universa*</sub> to either Al/Ca, Fe/Ca, or Mn/Ca for the core 2614 is insignificant (R<sup>2</sup>= 0.0047,  
117 0.0095 and 0.0497), suggesting that samples were not contaminated (Fig. S1). A high  
118 covariance between Mg/Ca and Mn/Ca, Fe/Ca and/or Al/Ca would imply insufficient clay  
119 removal during cleaning (Barker et al., 2003). Low correlation coefficients are also present in  
120 *O. universa* (R<sup>2</sup>= 0.24, 0.32 and 0.14) and *G. truncatulinoides* samples from core 2609 (R<sup>2</sup>=  
121 0.62, 0.58 and 0.02) (Fig. S2).

122 In Figures S3–S5, the downcore comparison of Mg/Ca ratios to the contaminant element ratios  
123 Al/Ca, Fe/Ca and Mn/Ca are shown. From the comparisons, unusually high Mg/Ca ratios  
124 relative to contaminant element ratios were excluded from the downcore records, as they led  
125 to unrealistically high temperature estimates (Table S1).

126

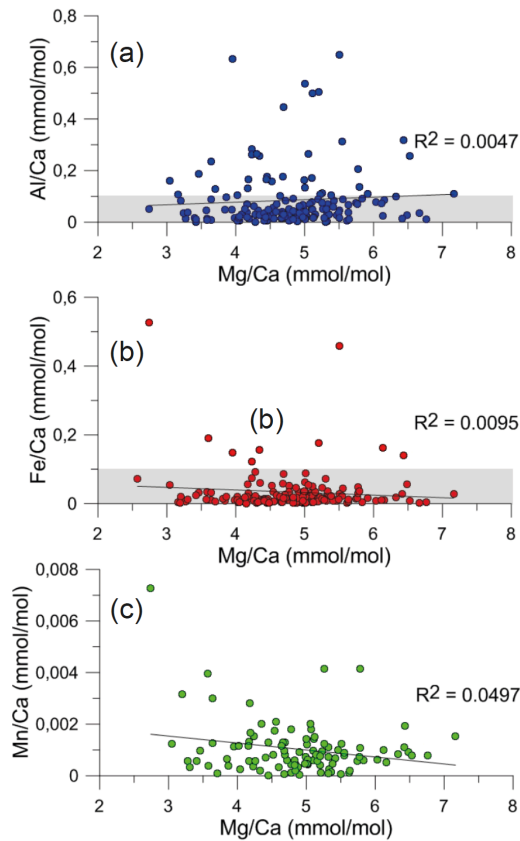

127  
 128 **Figure S1.** Contamination plots. Foraminiferal Mg/Ca vs. Al/Ca (a; blue), Fe/Ca (b; red) and Mn/Ca (c; green)  
 129 for *O. universa* from core 2614. Al/Ca, Fe/Ca and Mn/Ca partly exceed threshold values ( $>0.1 \text{ mmol mol}^{-1}$ , grey  
 130 shading) proposed by Barker et al. (2003).  $R^2$  = correlation coefficients.

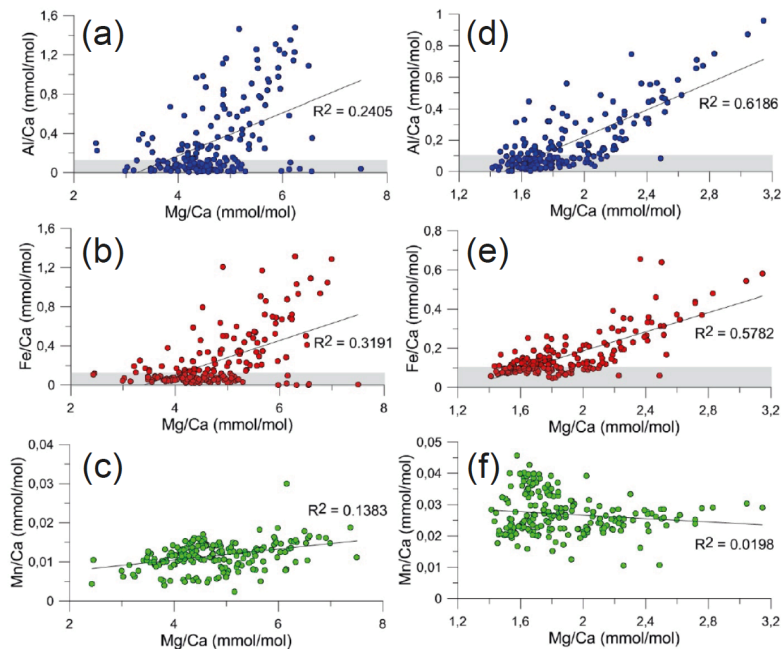

131  
 132 **Figure S2.** Contamination plots. Foraminiferal Mg/Ca vs. Al/Ca (blue), Fe/Ca (red) and Mn/Ca (green) for  
 133 *O. universa* (left; a, b, c) and *G. truncatulinoides* (right; d, e, f) from core 2609. Al/Ca, Fe/Ca and Mn/Ca partly  
 134 exceed threshold values ( $>0.1 \text{ mmol mol}^{-1}$ , grey shading) proposed by Barker et al. (2003).  $R^2$  = correlation  
 135 coefficients.

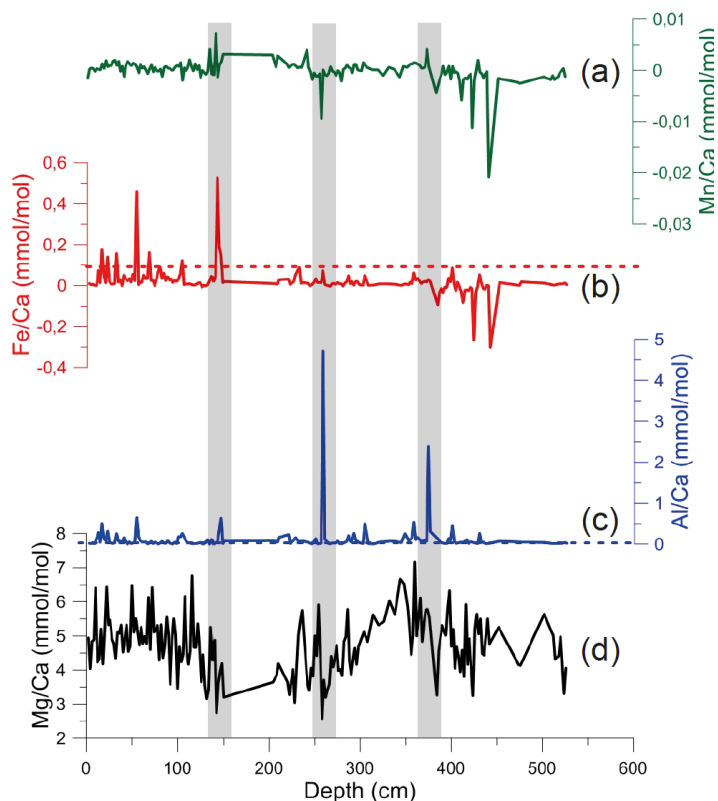

136  
 137 **Figure S3.** Downcore  $Mg/Ca_{O.universa}$  of core 2614 (d) in comparison to contaminant elemental ratios Al/Ca (c),  
 138 Fe/Ca (b), and Mn/Ca (a) from the same samples. Correlation coefficients are given in Figure S1. Threshold values  
 139 provided by Barker et al. (2003) indicative of sample contamination ( $>0.1 \text{ mmol mol}^{-1}$ ) are indicated by the dashed  
 140 lines, but should be viewed cautiously. Grey shaded bars mark the excluded samples (c.f. Table S1).

141  
 142  
 143 **Table S1.** Defined outliers with unusually high contaminant ratios taken out from further interpretations.

| Core | Sample depth (cm) | Sample species     | Mg/Ca (mmol mol <sup>-1</sup> ) | Al/Ca (mmol mol <sup>-1</sup> ) | Fe/Ca (mmol mol <sup>-1</sup> ) | Mn/Ca (mmol mol <sup>-1</sup> ) |
|------|-------------------|--------------------|---------------------------------|---------------------------------|---------------------------------|---------------------------------|
| 2614 | 142               | <i>O. universa</i> | 2.74                            | 0.05                            | 0.53                            | 0.007                           |
|      | 258               |                    | 2.57                            | 4.72                            | 0.07                            | -0.009                          |
|      | 374               |                    | 5.78                            | 2.39                            | 0.03                            | 0.004                           |
|      |                   | <i>G. trunca.</i>  | no data                         | no data                         | no data                         | no data                         |
| 2609 | 64                | <i>O. universa</i> | 7.38                            | 3.96                            | 1.96                            | 0.019                           |
|      | 166               |                    | 4.92                            | 2.22                            | 1.21                            | 0.08                            |
|      | 190               |                    | 6.05                            | 3.66                            | 1.69                            | 0.015                           |
|      | 26                | <i>G. trunca.</i>  | 2.46                            | 0.56                            | 0.46                            | 0.03                            |
|      | 52                |                    | 3.04                            | 0.87                            | 0.54                            | 0.03                            |
|      | 96                |                    | 3.14                            | 0.96                            | 0.58                            | 0.03                            |

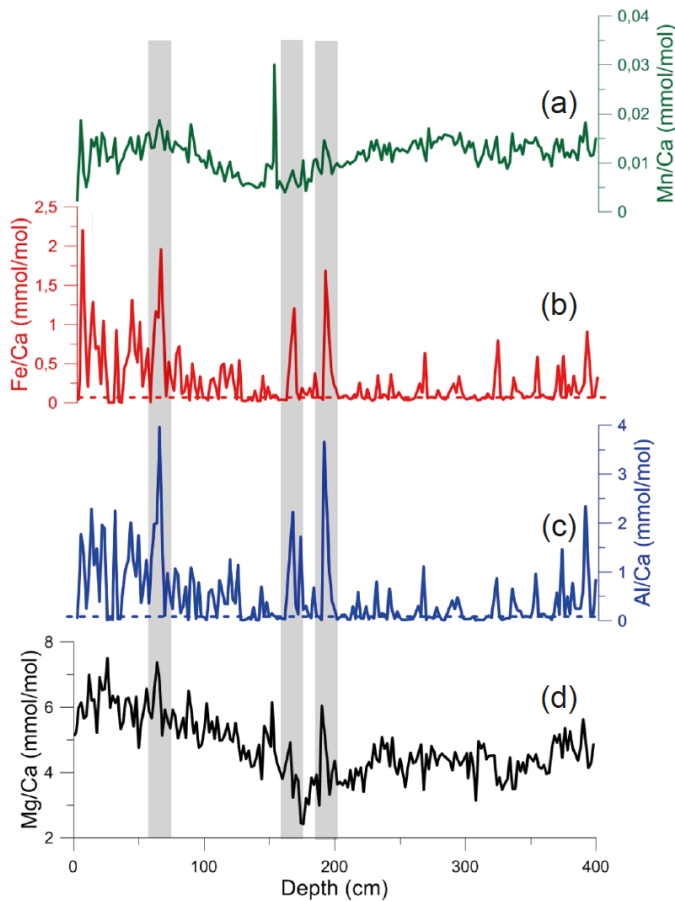

145  
 146 **Figure S4.** Downcore  $Mg/Ca_{O.universa}$  of core 2609 (d) in comparison to contaminant elemental ratios Al/Ca (c),  
 147 Fe/Ca (b), and Mn/Ca (a) from the same samples. Correlation coefficients are given in Figure S2. Threshold values  
 148 provided by Barker et al. (2003) indicative of sample contamination ( $>0.1 \text{ mmol mol}^{-1}$ ) are indicated by the dashed  
 149 lines, but should be viewed cautiously. Grey shaded bars mark the excluded samples (c.f. Table S1).

150

### 151 *Calcite dissolution effects and preferential Mg-ion removal*

152 Calcite dissolution in fact lowers foraminiferal Mg/Ca-based temperature estimates (e.g.,  
 153 Nürnberg et al., 1996; Regenberg et al., 2006). Nonetheless, many studies prove the large  
 154 potential of the Mg/Ca-paleothermometry even in calcite-unsaturated waters (e.g., Nürnberg et  
 155 al., 2015; Tapia et al., 2015). Approaches were introduced to correct for the  $Mg^{2+}$ -ion loss,  
 156 either by correcting for water depth (e.g., Regenberg et al., 2006; Dekens et al., 2002) or by  
 157 correcting for the degree of undersaturation with respect to calcite ion concentration (e.g.,  
 158 Regenberg et al., 2006; 2014). In the study area, the calcite saturation state  $\Delta(CO_3^{2-})$ , which is  
 159 the difference between the “*in situ*” carbonate ion concentration ( $CO_3^{2-}$ ) and ( $CO_3^{2-}$ ) at  
 160 saturation, is  $0 \mu\text{mol kg}^{-1}$  at  $>3700 \text{ m}$  water depth today (Regenberg et al., 2006). The  $\sim 21.3$   
 161  $\pm 6.6 \mu\text{mol kg}^{-1}$  threshold being considered as critical for selective  $Mg^{2+}$ -removal (Regenberg  
 162 et al., 2006; 2014) is clearly shallower at  $\sim 1500 \text{ m}$  water depth in the study area. While our  
 163 western core 2614 from a water depth of  $1070 \text{ m}$  is above this critical threshold level, the



164 eastern core 2609 is ~500 m below this threshold level, making the dissolution-related  
 165 perturbation of the Mg/Ca-signal possible. Nonetheless, the Holocene mean SST<sub>Mg/Ca</sub> and  
 166 subSST<sub>Mg/Ca</sub> estimates appear close to the modern temperatures at the respective water depths  
 167 (Fig. 2) suggesting that selective Mg<sup>2+</sup>-ion removal due to calcite dissolution processes is rather  
 168 negligible.

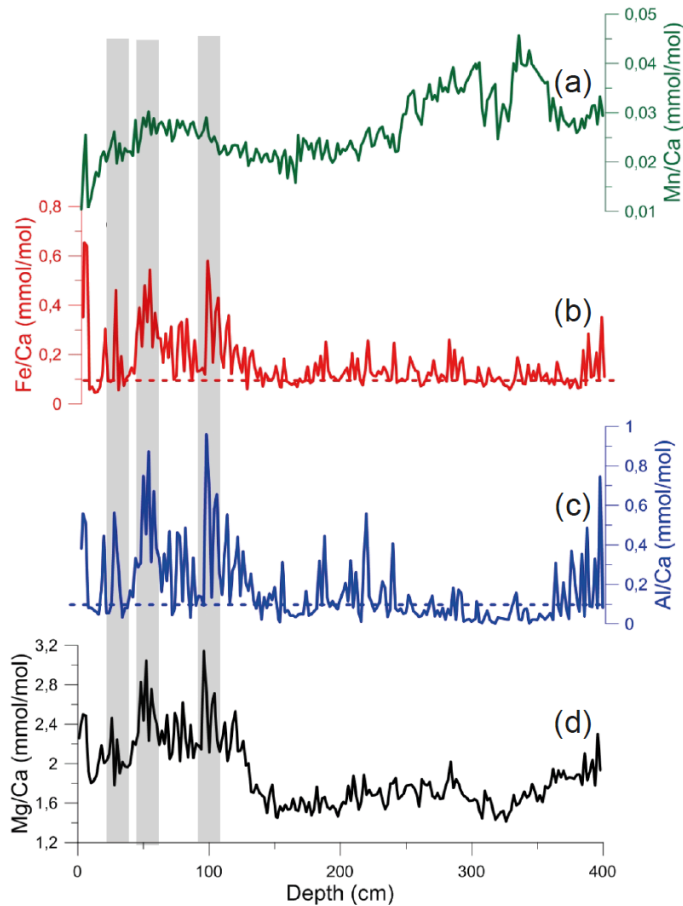

169  
 170 **Figure S5.** Downcore Mg/Ca<sub>G.trunca</sub> of core 2609 (d) in comparison to contaminant elemental ratios Al/Ca (c),  
 171 Fe/Ca (b), and Mn/Ca (a) from the same samples. Correlation coefficients are given in Figure S2. Threshold values  
 172 provided by Barker et al. (2003) indicative of sample contamination (>0.1 mmol mol<sup>-1</sup>) are indicated by the dashed  
 173 lines, but should be viewed cautiously. Grey shaded bars mark the excluded samples (c.f. Table S1).

174

175 *Analytical results: Oxygen isotopes ( $\delta^{18}O$ ) and Mg/Ca ratios*

176 *Western core 2614*

177 The  $\delta^{18}O_{G.ruber}$  record of core 2614 (van der Kaars et al., 2017) is rather similar to the  
 178  $\delta^{18}O_{O.universa}$  record with respect to downcore variations and the deglacial amplitude change,  
 179 although absolute  $\delta^{18}O_{G.ruber}$  values are on average lighter by ~0.5 ‰. The  $\delta^{18}O_{O.universa}$  record  
 180 is generally lighter than the  $\delta^{18}O_{G.trunca}$  record, with  $\delta^{18}O_{O.universa}$  showing a range between 0.1

181 and 1.5 ‰, while  $\delta^{18}\text{O}_{G.trunca.}$  values are heavier ranging between 0.6 and 3.5 ‰ (Fig. S6). The  
 182 species-specific  $\delta^{18}\text{O}$ -values hence, reflect the according living depths of the three species.  
 183 The downcore variations in  $\text{Mg}/\text{Ca}_{O.universa}$  are broadly reflected by  $\text{Mg}/\text{Ca}_{G.ruber}$ , although the  
 184 amplitude fluctuations appear to be larger in  $\text{Mg}/\text{Ca}_{O.universa}$ .  $\text{Mg}/\text{Ca}_{O.universa}$  is overall higher ( $\sim$ 3-  
 185 7.5  $\text{mmol mol}^{-1}$ ) than  $\text{Mg}/\text{Ca}_{G.trunca.}$ , ( $\sim$ 0.8-5.2  $\text{mmol mol}^{-1}$ ) (Fig. S6). Notably,  $\text{Mg}/\text{Ca}_{G.trunca.}$   
 186 exhibits various prominent excursions to extremely high values  $>4.5 \text{ mmol mol}^{-1}$  and  
 187 amplitudes of  $>4 \text{ mmol mol}^{-1}$ .

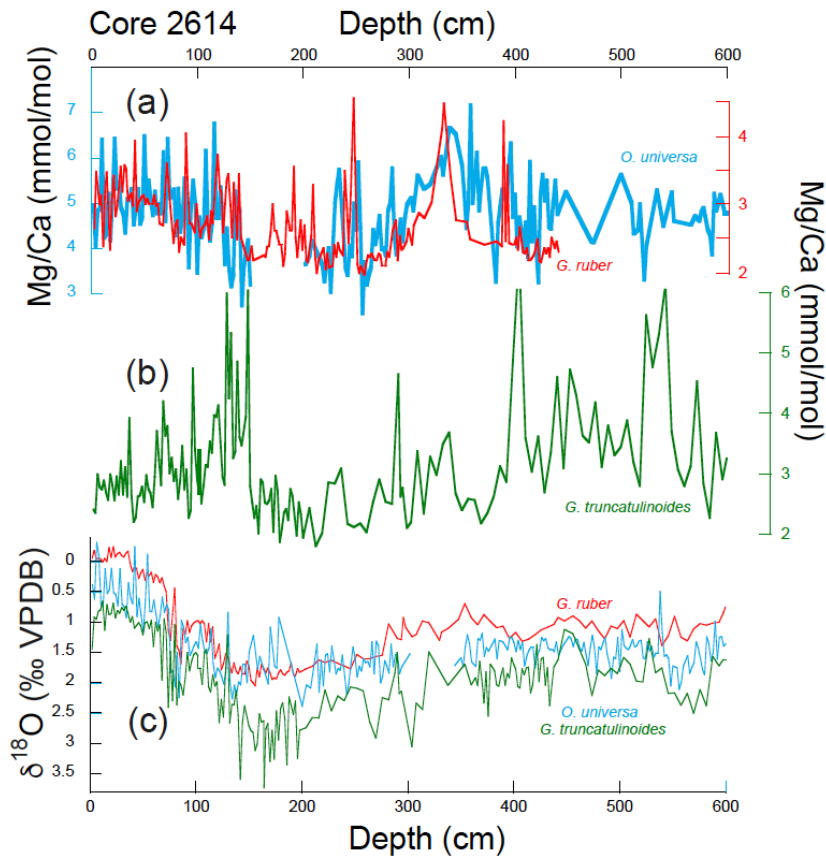

188  
 189 **Figure S6.** Analytical results for western core 2614. (a) Mg/Ca ratios of *G. ruber* (red), *O. universa* (blue) and  
 190 (b) *G. truncatulinoides* (green). (c) Species-specific  $\delta^{18}\text{O}$  records. The  $\delta^{18}\text{O}_{G.ruber}$  data are from van der Kaars et  
 191 al. (2017).

192  
 193 *Eastern core 2609*

194 Similar to core 2614, the absolute  $\delta^{18}\text{O}$  values in the eastern core 2609 reflect the increasing  
 195 calcification depths of the studied species, with  $\delta^{18}\text{O}_{G.trunca.} > \delta^{18}\text{O}_{O.universa} > \delta^{18}\text{O}_{G.ruber}$ . The  
 196  $\delta^{18}\text{O}_{G.ruber}$  record is lighter by on average  $\sim$ 0.5 ‰ than the  $\delta^{18}\text{O}_{O.universa}$  record, while their  
 197 downcore amplitude variations are quite similar (Fig. S7). Both records are lighter by  $\sim$ 0.7-2  
 198 ‰ than the  $\delta^{18}\text{O}_{G.trunca}$  record. Notably, the downcore  $\delta^{18}\text{O}_{G.trunca}$  variations are larger than

199 those of the surface-dweller. They resemble those of core 2614, but are clearly heavier (Fig.  
200 S6).

201 The  $Mg/Ca_{O.universa}$  and  $Mg/Ca_{G.trunca.}$  records range between  $\sim 3$ - $5$ - $7$   $mmol\ mol^{-1}$ , and downcore  
202 variations are rather similar not exceeding  $\sim 2$   $mmol\ mol^{-1}$  (Fig. S7). The  $Mg/Ca_{G.trunca.}$  record  
203 is on average  $\sim 4$   $mmol\ mol^{-1}$  lower than those of the shallow-dweller, and exhibits significantly  
204 lowered  $Mg/Ca_{G.trunca.}$  below  $\sim 1.4$  m core depth. Compared to core 2614, the core 2609  
205  $Mg/Ca_{G.trunca.}$  record shows only small-scale amplitude variations of  $>1$   $mmol\ mol^{-1}$ .

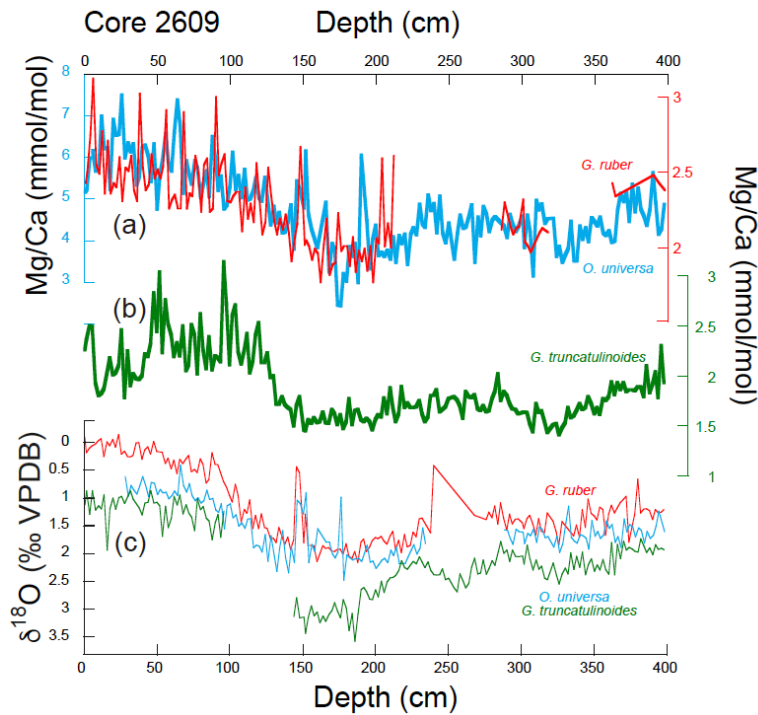

206  
207 **Figure S7.** Analytical results for eastern core 2609. (a)  $Mg/Ca$  ratios of *G. ruber* (red), *O. universa* (blue) and (b)  
208 *G. truncatulinoides* (green). (c) Species-specific  $\delta^{18}O$  records.

209

### 210 *Foraminiferal Mg/Ca-paleothermometry*

#### 211 *O. universa*

212 The  $Mg/Ca$  ratios of *O. universa* were converted into sea surface temperatures ( $SST_{Mg/Ca}$ ) using  
213 available species-specific temperature calibrations (c.f. Fig. S8, S9). We finally chose the  
214 calibration equation of Hathorne et al. (2003). This calibration function  
215 ( $Mg/Ca = 0.95 \exp(0.086 SST)$ ) is based on *O. universa* specimens recovered from a  
216 latitudinal transect in the North Atlantic to monitor their Mg-uptake. The calibration of  
217 Hathorne et al. (2003) provides a mean Holocene  $SST_{Mg/Ca}$  of  $\sim 19.6^\circ C$  in the western area,  
218 which is in broad agreement with the modern austral summer SST range in the upper  
219 thermocline/mixed layer ( $\sim 30$ - $80$  m water depth) (Fig. S8, S9; c.f. Fig. 2). In the eastern area,

220 the same calibration provides a mean Holocene SST<sub>Mg/Ca</sub> of ~20.5° C, which exceeds the  
 221 modern austral summer SST range. A discussion on this issue can be found in Chapter 4.3.  
 222 The Russell et al. (2004) equation (Mg/Ca = 0.85 exp(0.096 SST)) provides results rather  
 223 similar to the Hathorne et al. (2003) equation (Fig. S8). Other calibration functions from Lea  
 224 et al. (1999), Anand et al. (2003a), and Regenberg et al. (2009) (Mg/Ca = 1.36 exp(0.085 SST);  
 225 Mg/Ca = 0.38 exp(0.09 SST); Mg/Ca = 0.29 exp(0.101 SST)) provide either by several degrees  
 226 too warm or too low SST-estimates.

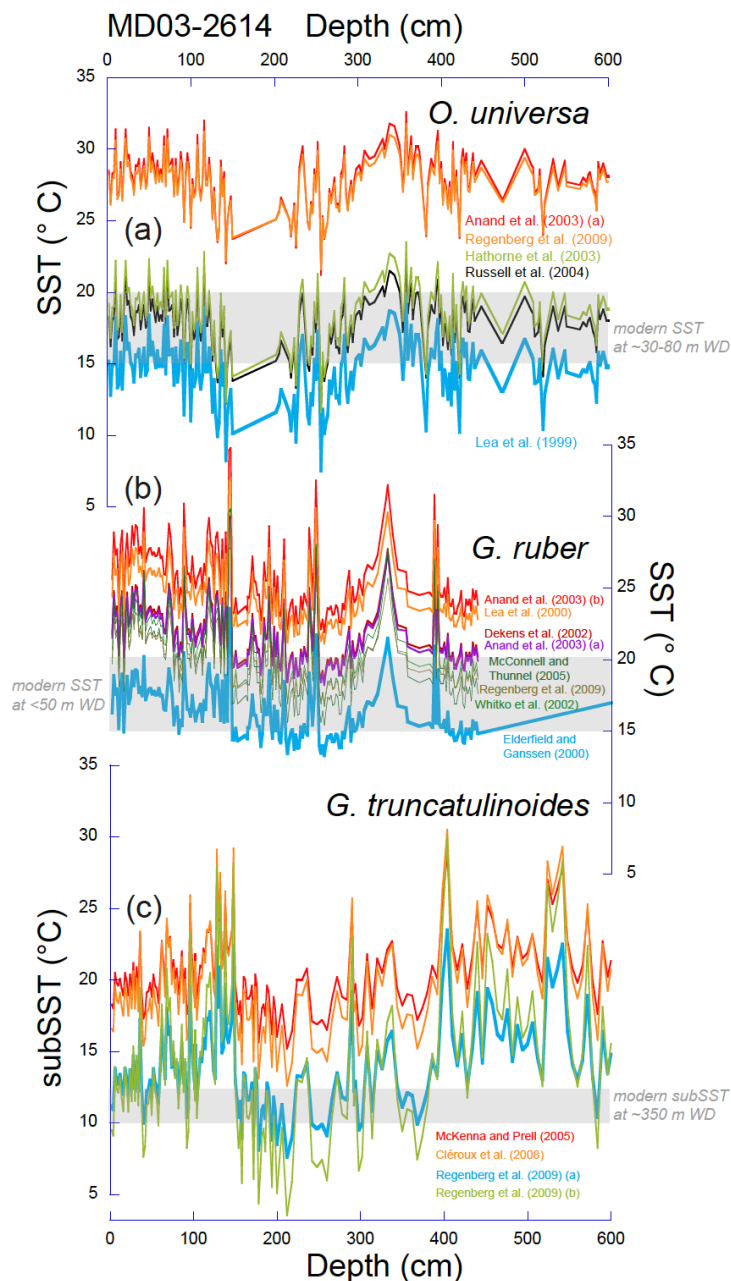

227  
 228 **Figure S8.** Calculated Mg/Ca-based temperatures from 0-600 cm core depth for western core 2614. The Mg/Ca  
 229 data of *O. universa* (a), *G. ruber* (b), and *G. truncatulinoides* (c) were converted using species-specific  
 230 temperature calibrations (c.f. legend). Modern annual SST at ~30-80 m, <50 m and ~350 m water depth are  
 231 indicated (WOA, Locarnini et al., 2018), which are the most likely habitats of the studied species.

232 *G. ruber*

233 Although the Mg/Ca ratios of *G. ruber* follow in course and amplitude the according records  
234 of *O. universa*, and can be therefore taken as reliable support, we refrained from calculating  
235  $SST_{Mg/Ca}$  from  $Mg/Ca_{ruber}$  due to the following reasons: All temperature equations available for  
236 *G. ruber* (Lea et al., 2000:  $Mg/Ca = 0.30 \exp(0.089 \text{ SST})$ ; Anand et al., 2003:  $Mg/Ca =$   
237  $0.38 \exp(0.09 \text{ SST})$ ,  $Mg/Ca = 0.342 \exp(0.09 \text{ SST})$ ; Dekens et al., 2002:  $Mg/Ca =$   
238  $0.37 \exp(0.09(\text{SST}-0.36(\text{core depth in km}) - 2.0^\circ \text{ C})$ ; McConnell and Thunel et al., 2005:  
239  $Mg/Ca = 0.69 \exp(0.068 \text{ SST})$ ; Regenberg et al., 2009:  $Mg/Ca = 1.43 \exp(0.047 \text{ SST})$ ; Whitko  
240 et al., 2002:  $Mg/Ca = 0.57 \exp(0.074 \text{ SST})$ ) provide SSTs, which are warmer by several  
241 degrees than the modern austral summer SST at <50 m water depth, and reach unrealistic paleo-  
242 SST of even >30° C in the western core 2614 (Fig. S8, S9). Only the Elderfield and Ganssen  
243 (2000) equation ( $Mg/Ca = 0.52 \exp(0.10 \text{ SST})$ ) provides a late Holocene  $SST_{Mg/Ca}$ , which  
244 comes close to the modern austral summer SST at <50 m water depth (15-16° C at core location  
245 2609; 17-19° C at core location 2614). The core-top  $SST_{Mg/Ca}$ -estimates derived from *G. ruber*  
246 are hence, quasi equally warm than those of *O. universa*. As the Elderfield and Ganssen (2000)  
247 equation, however, is a non-species-specific calibration but relies on various planktonic  
248 foraminiferal species, we assess this equation not applicable and hence, do not use the *G. ruber*  
249 proxy data for further interpretation.

250

251 *G. truncatulinoides*

252 The Mg/Ca ratios of the deep-dwelling *G. truncatulinoides* were converted into subsurface  
253 temperatures ( $subSST_{Mg/Ca}$ ) using the calibration equation of Regenberg et al. (2009) ( $Mg/Ca$   
254  $= 1.32 \exp(0.05 \text{ TT})$ ). The Regenberg et al. (2009) study was based on calibrating Mg/Ca ratios  
255 of multiple planktonic foraminifera species (including *G. truncatulinoides*) obtained from  
256 (sub)tropical Atlantic sediment-surface samples with  $\delta^{18}\text{O}$ -derived calcification temperatures.  
257 The calibration provided Holocene  $subSST_{Mg/Ca}$  estimates, which agree with the modern annual  
258 thermocline temperatures at the preferred depth of *G. truncatulinoides* in our study area (Fig.  
259 S8, S9). The error (standard deviation  $2\sigma$ ) is  $\pm 1.0^\circ \text{ C}$ . Other existing paleotemperature  
260 calibrations specific to *G. truncatulinoides* (e.g., McKenna and Prell, 2004:  $Mg/Ca =$   
261  $0.355 \exp(0.098 \text{ TT})$ ; Cléroux et al., 2008:  $Mg/Ca = 0.62 \exp(0.074 \text{ TT})$ ; Regenberg et al.,  
262 2009:  $Mg/Ca = 0.84 \exp(0.083 \text{ TT})$  and  $Mg/Ca = 1.32 \exp(0.05 \text{ TT})$ ) provide  $TT_{Mg/Ca}$   
263 estimates that are >7° C warmer than modern annual subsurface temperatures.

264

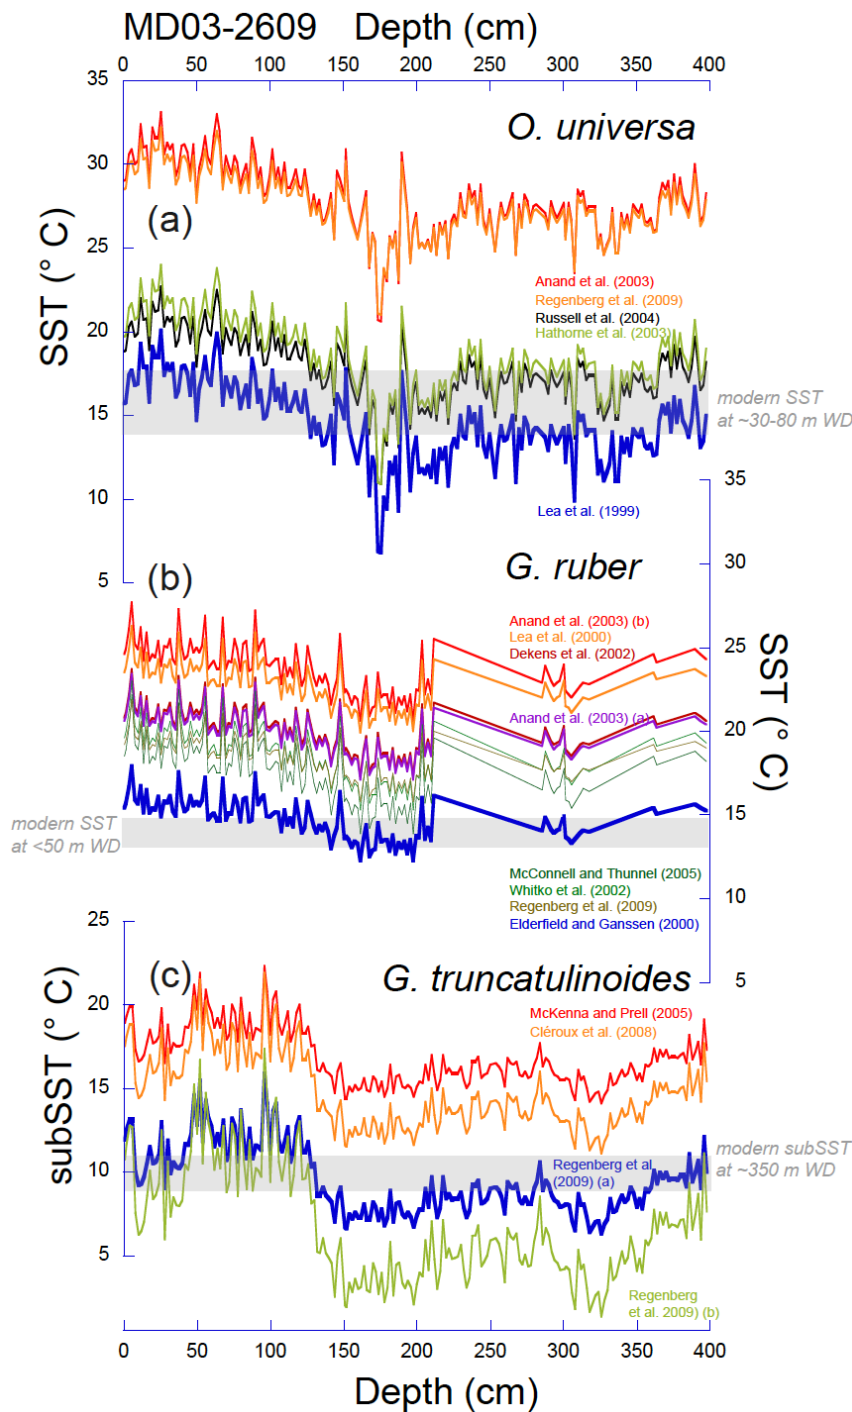

265

266 **Figure S9.** Calculated Mg/Ca-based temperatures from 0-400 cm core depth for eastern core 2609. The Mg/Ca  
 267 data of *O. universa* (a), *G. ruber* (b) and *G. truncatulinoides* (c) were converted using species-specific temperature  
 268 calibrations (c.f. legend). Modern annual SST at ~30-80 m, <50 m and ~350 m water depth are indicated (WOA,  
 269 Locarnini et al., 2018), which are the most likely habitats of the studied species.

270

271 Growth seasonality is a relevant factor, which influences planktonic foraminiferal proxies and  
 272 creates seasonal biases in the proxy signal recorded in a fossil assemblage (Jonkers and Kučera,  
 273 2015). The Holocene SST<sub>Mg/Ca</sub> estimates from the eastern core region are ~3-5°C warmer than  
 274 the modern annual temperature range in the region. We take this as indication that the derived

275 SST<sub>Mg/Ca</sub> values represent the austral summer range during the Holocene. A seasonal bias for  
276 the reconstructed TT<sub>Mg/Ca</sub> records is considered minimal, although Jonkers and Kučera (2015)  
277 noted that the flux pattern of *G. truncatulinoides* is focused towards winter and spring. Overall,  
278 we presuppose that the habitat depths of the selected planktonic foraminifera are relatively  
279 stable through time.

280

#### 281 *pH-effect on foraminiferal Mg/Ca*

282 Gray and Evans (2019) showed by culture experiments that the Mg/Ca-ratios of some  
283 planktonic species are sensitive to carbonate chemistry: Foraminiferal Mg/Ca declines with  
284 increasing pH (−5 to −9 % per 0.1 pH units). These results are mainly in accordance to earlier  
285 studies. Lea et al. (1999) claimed that seawater pH changes shell Mg/Ca by -6 % per 0.1 pH  
286 unit increase. Russell et al. (2004) stated: “Below ambient pH (pH < 8.2), Mg/Ca decreased by  
287  $7 \pm 5$  % (*O. universa*) to  $16 \pm 6$  % (*G. bulloides*) per 0.1 unit increase in pH. Above ambient  
288 pH, the change in Mg/Ca was not significant for either species (Russell et al., 2004)”.  
289 Congruently, Kisakürek et al. (2008) found that the influence of pH on Mg/Ca ratios is  
290 negligible at ambient seawater pH (8.1 to 8.3). Below a seawater pH of 8.0, instead, pH has a  
291 dominating control on shell Mg/Ca. Hence, Russell et al. (2004) concluded that Mg/Ca-based  
292 paleotemperatures for the Quaternary, during which surface-ocean pH has been at or above  
293 modern levels, have not been biased by variations in surface-water pH.

294 The negative Mg/Ca vs. pH relationship is balanced by the fact that foraminiferal Mg/Ca is  
295 positively correlated with salinity: Nürnberg et al. (1996) already showed from culture  
296 experiments that Mg/Ca in *T. sacculifer* changes by 7-10 % per salinity unit. Lea et al. (1999)  
297 described a  $4 \pm 3$  % change in Mg/Ca per salinity unit for *G. bulloides*, which is rather  
298 consistent to the  $4 \pm 3$  % change per salinity unit for *G. ruber*. The Arbuszewski et al. (2010)  
299 study referred to an even higher salinity dependence ( $27 \pm 4$  %). Taken all data together, these  
300 results point to a strongly non-linear, positive salinity effect on shell Mg/Ca ratios.

301 Following Sanyal et al. (1995), who suggested an increase in salinity (by 1 unit) and pH (by  
302  $0.2 \pm 0.1$ ) in the oceans during the LGM, Lea et al. (1999) concluded that their opposing effects  
303 on shell Mg/Ca should partially cancel each other (also pointed out in Nürnberg, 2000).

304 Gray and Evans (2019) undertook new efforts in this respect. They claim that “the (pH) effect  
305 on Mg/Ca is considerably greater than that of salinity, resulting in a large bias in reconstructed  
306 temperature if unaccounted for... (Gray and Evans, 2019)”. They presented the new software  
307 package “MgCaRB”, which allows to correct foraminiferal Mg/Ca for pH down-core using

308 either atmospheric CO<sub>2</sub> or (preferably) boron isotopes  
 309 (<https://willyrgray.shinyapps.io/mgcarb1/>).

310 To better assess a possible bias of changed ocean pH on our reconstructed SST reconstructions  
 311 off southern Australia, we applied the MgCaRB routines (Gray and Evans, 2019) to our Mg/Ca  
 312 datasets. When using the program’s CO<sub>2</sub> approach, the relevant input parameters “modern  
 313 salinity” and “modern alkalinity” were taken from the Ocean Data View (ODV) database  
 314 from the respective core locations and species living depths (Table S2; Goyet et al., 2000). The  
 315 resulting SST<sub>Mg/Ca</sub> records calculated with these modified salinity and alkalinity parameters  
 316 (Table S2; grey and blue curves in Fig. S10) deviate within error for SST<sub>Mg/Ca</sub> estimates ( $\pm \sim 1^\circ$   
 317 C) from those calculated with the MgCaRB default settings. We hence consider these  
 318 modifications of minor importance.

319

320 **Table S2.** For the assessment of the pH-effect on foraminiferal Mg/Ca, MgCaRB requires the input parameters  
 321 “modern salinity”, “modern alkalinity”, and the assumed “modern pCO<sub>2</sub> disequilibrium” at the study sites.  
 322 Modern salinity and alkalinity from the respective core locations and species living depths are from Goyet et al.  
 323 (2000). For the modern pCO<sub>2</sub> disequilibrium, we tested 3 scenarios (see text).

|                         | Habitat depth (m) | Salinity (psu) | Total alkalinity ( $\mu\text{mol kg}^{-1}$ ) | pCO <sub>2</sub> disequil. ( $\mu\text{atm}$ ) |                    |
|-------------------------|-------------------|----------------|----------------------------------------------|------------------------------------------------|--------------------|
| MD03-2614               | 30-80             | 34.7           | 2288                                         | -70 / 0 / +70                                  | <i>O. universa</i> |
| 34.7°S 123.4° E         | 350-400           | 34.6           | 2290                                         | -70 / 0 / +70                                  | <i>G. trunca.</i>  |
| MD03-2609               | 30-80             | 34.7           | 2279                                         | -70 / 0 / +70                                  | <i>O. universa</i> |
| 39.4°S 141.5° E         | 350-400           | 34.8           | 2286                                         | -70 / 0 / +70                                  | <i>G. trunca.</i>  |
| MgCaRB default settings |                   | 35.0           | 2300                                         | 0                                              |                    |

324

325 MgCaRB offers 3 Mg/Ca vs. temperature calibrations, which might be applied to the  
 326 *O. universa* Mg/Ca values. The “multispecies” calibration produces unreasonable SST<sub>Mg/Ca</sub>  
 327  $>24^\circ$  C far above modern conditions and is hence not considered. The “generic calibration”  
 328 provides SST<sub>Mg/Ca</sub>, which are  $\sim 1$ - $2^\circ$  C cooler than those calculated with the “species-specific”  
 329 calibration. Both calibrations provide core-top SST<sub>Mg/Ca</sub>, which refer to austral winter SST.  
 330 Instead, the Hathorne et al. (2003) calibration specifically established for *O. universa* and used  
 331 in our study, provides warmer-by- $3^\circ$  C core-top SST<sub>Mg/Ca</sub>, which is basically consistent with  
 332 the austral summer SST in the area (see above why we opted for the calibration of Hathorne et  
 333 al., 2003).

334 Notably, the MgCaRB-derived SST<sub>Mg/Ca</sub> records exhibit clearly cooler LGM conditions and  
 335 higher amplitude variations (by  $2$ - $3^\circ$  C) through time than the non-pH-corrected SST<sub>Mg/Ca</sub>  
 336 record presented in our study (Fig. S10), which we assume less likely. Further, all MgCaRB  
 337 calculations provide core-top ( $\sim 1.3$  ka BP) pH-estimates of  $\sim 8.18$ , which are definitely higher



338 than the modern surface ocean pH-value south of Australia (8.105-8.11; Gregor and Gruber,  
 339 2021; Raven et al., 2005). Downcore, the pH changes from 8.18 to 8.32 (at MgCaRB default  
 340 settings). If Kisakürek et al. (2008) are correct, the influence of pH on Mg/Ca ratios in this pH-  
 341 range is negligible.

342 For the deep-dwelling *G. truncatulinoides*, MgCaRB only offers the “multispecies”  
 343 calibration, which produces unrealistic core-top subSST<sub>Mg/Ca</sub> values being higher-by-3-4° C  
 344 than the modern subSST conditions. We hence will not continue to discuss the ph-corrected  
 345 subSST<sub>Mg/Ca</sub> records.

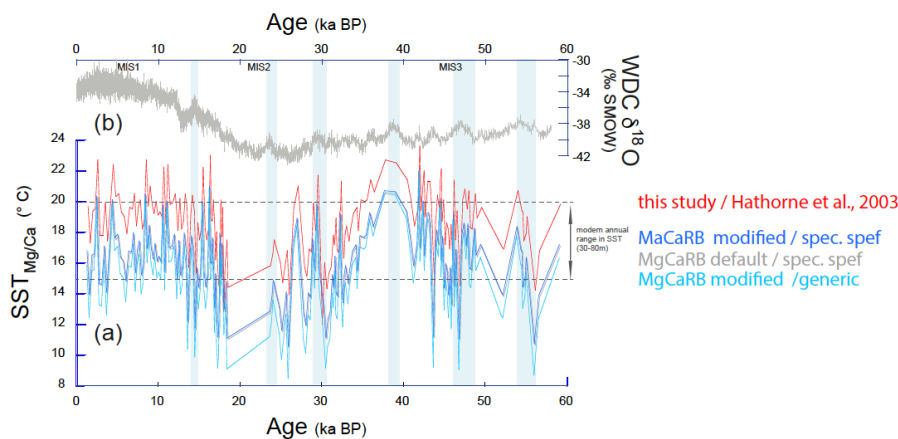

346  
 347 **Figure S10.** (a) Comparison of differently calculated SST records based on foraminiferal Mg/Ca<sub>*O. universa*</sub> from Site  
 348 MD03-2614. Red: SST<sub>Mg/Ca</sub> record used in the manuscript, based on the Mg/Ca vs. T-relationship of Hathorne et  
 349 al. (2003). Grey: SST<sub>Mg/Ca</sub> record calculated with MgCaRB using the default program settings and the *O. universa*  
 350 species-specific calibration. Blue and light blue: SST<sub>Mg/Ca</sub> records calculated with MgCaRB using modified  
 351 salinity and alkalinity settings (Table S1), and the species-specific (blue) and generic calibrations (light blue) for  
 352 *O. universa*. (b) West Antarctic Ice Sheet Divide Core δ<sup>18</sup>O record (WAIS Divide Project Members, 2015) as  
 353 reference for the southern hemisphere climate signal.

354  
 355 In a further step, MgCaRB offers to include a value for the “modern pCO<sub>2</sub> disequilibrium” at  
 356 the study site. The “modern pCO<sub>2</sub> disequilibrium” and its effect on the SST<sub>Mg/Ca</sub> estimates is  
 357 difficult to assess due to the sparse database south of Australia. We first opted for the MgCaRB  
 358 default setting of 0 μatm, pointing to equal pCO<sub>2</sub> concentrations in surface water and  
 359 atmosphere. In a second step, we varied the pCO<sub>2</sub> disequilibrium conditions from -70 μatm  
 360 (suggesting that the surface ocean is a CO<sub>2</sub>-sink) to 70 μatm (surface ocean is a CO<sub>2</sub>-source).  
 361 These values are considered as reasonable endmember values for our evaluation (c.f. Takahashi  
 362 et al., 2009). For the study area, in fact, monthly mean values for sea–air pCO<sub>2</sub> differences are  
 363 clearly lower and range between ~-10 to ~-40 μatm (Takahashi et al., 2009) pointing to overall  
 364 CO<sub>2</sub> absorbing (sink) conditions.

365 When applying MgCaRB, the more negative the pCO<sub>2</sub> disequilibrium is, the more positive will  
366 be the according SST<sub>Mg/Ca</sub> and pH estimates. Fig. S11 shows the core 2614 and core 2609 ph-  
367 corrected SST<sub>Mg/Ca</sub> records at the three different “modern pCO<sub>2</sub> disequilibrium” conditions  
368 outlined above: -70 μatm, 0 μatm (default), and +70 μatm. The according errors in SST<sub>Mg/Ca</sub>  
369 amount to on average ±0.9° C.

370 When assuming that the surface waters at the western Site 2614 originate mainly from tropical  
371 ocean areas (CO<sub>2</sub>-source; releasing 0.5-1 mol C m<sup>-2</sup> y<sup>-1</sup>; McKinley et al., 2017; more positive  
372 pCO<sub>2</sub> disequilibrium; c.f. Takahashi et al., 2009; Greenop et al., 2017) while the eastern site is  
373 not, the western core would become even cooler at seasurface, thereby enhancing the SST<sub>Mg/Ca</sub>  
374 difference between the two sites. Instead at subsurface level: When assuming that the  
375 subsurface waters at the eastern Site 2609 are fed by subducted southern-sourced surface  
376 waters (CO<sub>2</sub>-sink; absorbing CO<sub>2</sub> by -1 mol C m<sup>-2</sup> y<sup>-1</sup>; McKinley et al., 2017; more negative  
377 pCO<sub>2</sub> disequilibrium; c.f. Takahashi et al., 2009; Greenop et al., 2017), then the subSST<sub>Mg/Ca</sub>  
378 at the eastern location would likely become warmer, reducing the subSST<sub>Mg/Ca</sub> gradient to the  
379 western location. This effect is likely very small, as the deglacial ph of subantarctic surface  
380 water never fell below 8.0 (Shuttleworth et al., 2021), with almost negligible effects on  
381 foraminiferal Mg/Ca.

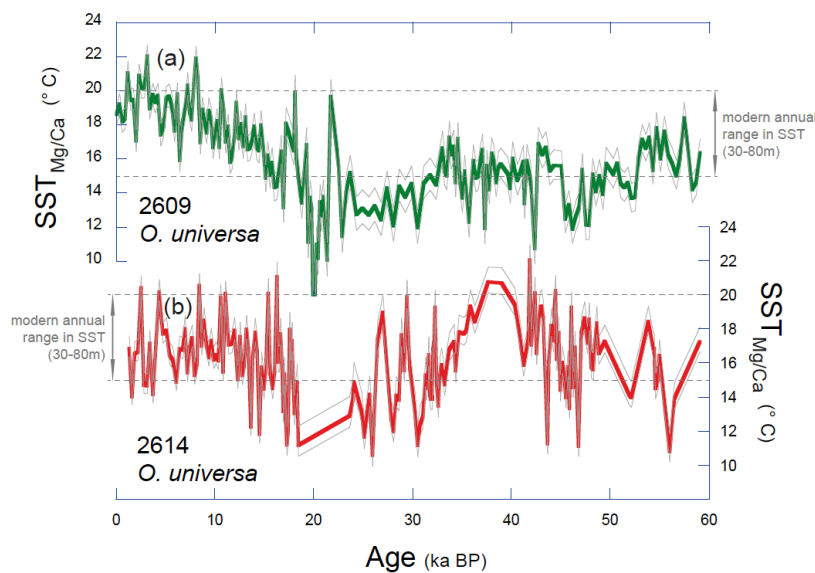

382  
383 **Figure S11.** The core 2609 (a) and core 2614 (b) ph-corrected SST<sub>Mg/Ca</sub> records (using MgCaRB) at the three  
384 different “modern pCO<sub>2</sub> disequilibrium” conditions outlined above: -70 μatm (upper grey record), 0 μatm (red  
385 and green), and +70 μatm (lower grey record). The hatched lines mark the modern annual range in SST at 30-80  
386 m water depth.  
387

388 We cannot clarify all the issues raised by the Gray and Evans (2019) study, but our  
 389 considerations imply that the ph-effect on our temperature reconstructions remains such small  
 390 ( $<0.9^{\circ}\text{C}$ ; see above) that it has no major implication for our paleoceanographic interpretations.  
 391 We note, instead, that it is the chosen Mg/Ca vs. temperature calibration, which is most crucial  
 392 to our study. The choice of an inadequate (not regionally and species-specific calibrated)  
 393 calibration equation may introduce errors. With respect to the warmer late Holocene  $\text{SST}_{\text{Mg/Ca}}$   
 394 at the eastern site compared to the western site – which is basically opposite to what is initially  
 395 expected from the modern situation - we give to consider that the late Holocene raw  
 396  $\text{Mg/Ca}_{O.universa}$  ratios at the eastern site are undoubtedly higher than at the western location,  
 397 affording a more differentiated interpretation.

398

399 *Age model of sediment core MD03-2609 northwest of King Island.*

400 The age model of core MD03-2609 is primarily based on the tuning of multiple planktonic  
 401  $\delta^{18}\text{O}$  records to those of the well-dated reference core 2614 (van der Kaars et al., 2017). The  
 402 tuning is further supported by 3 radiocarbon ( $\text{AMS}^{14}\text{C}$ ) datings (Fig. 3; c.f. Table S3), for which  
 403 a mix of shallow-dwelling planktonic foraminiferal tests was selected. The measurements were  
 404 accomplished by Beta Analytic Radiocarbon Dating Laboratory, Florida, USA  
 405 (info@betalabservices.com). All  $\text{AMS}^{14}\text{C}$  dates were calibrated applying the BetaCal4.20  
 406 software, using the MARINE20 database. The marine calibration incorporates a time-  
 407 dependent global ocean reservoir correction of  $\sim 550$   $^{14}\text{C}$  yrs at 200 cal BP to  $\sim 410$   $^{14}\text{C}$  yrs at  
 408 0 cal BP (Heaton et al., 2020). To account for local effects, the difference  $\Delta R$  in reservoir age  
 409 of the study area south of Australia and the model ocean was additionally considered. The  
 410 Calib7.1 marine reservoir correction database provides a  $\Delta R$ -value of  $-84 \pm 65$  years (Stuiver  
 411 and Reimer, 1993).

412

413 **Table S3.** Radiocarbon ( $\text{AMS}^{14}\text{C}$ ) datings performed on sediment core MD03-2609.

| Core<br>MD03-2609 | Remark                    | Lab code    | Sample<br>type | $^{14}\text{C}$ age<br>raw | Age error | Calibrated<br>median age | Age<br>error | Reference      |
|-------------------|---------------------------|-------------|----------------|----------------------------|-----------|--------------------------|--------------|----------------|
| Depth (cm)        |                           |             |                | (yrs BP)                   | +/- (yrs) | (yrs BP)                 | +/- (yrs)    |                |
| 164               | $\text{AMS}^{14}\text{C}$ | BETA-626880 | mixed planktic | 18610                      | 60        | 19040                    | 60           | this study     |
| 230               | $\text{AMS}^{14}\text{C}$ | BETA-626881 | mixed planktic | 32530                      | 230       | 32970                    | 230          | this study     |
| 304               | $\text{AMS}^{14}\text{C}$ | BETA-626882 | mixed planktic | 40820                      | 530       | 41250                    | 530          | this study     |
| 314               | $\text{AMS}^{14}\text{C}$ | BETA-626883 | mixed planktic | 40820                      | 520       | 41240                    | 520          | not considered |

414

415 **References**

- 416 Andrijanic, S.: Geographical distribution of living planktonic foraminifera (Protozoa) off the east coast of  
417 Australia. *Mar. Freshw. Res.*, 39 (1), 71–85, 1988.
- 418 Anand, P., Elderfield, H., and Conte, M.H.: Calibration of Mg/Ca thermometry in planktonic foraminifera from a  
419 sediment trap time series. *Paleoceanography*, 18 (2), 2003.
- 420 Arbuszewski, J., deMenocal, P., Kaplan, A., and Farmer, E.C.: On the fidelity of shell-derived  $\delta^{18}\text{O}_{\text{seawater}}$   
421 estimates. *Earth Planet. Sci. Lett.*, doi:10.1016/j.epsl.2010.10.035, 2010.
- 422 Barker, S., Greaves, M., and Elderfield, H.: A study of cleaning procedures used for foraminiferal Mg/Ca  
423 paleothermometry. *Geochem. Geophys. Geosystems*, 4(9), 8407, doi:10.1029/2003GC000559, 2003.
- 424 Bé, A.W.H. and Tolderlund, D.S.: Distribution and ecology of living planktonic foraminifera in surface water of  
425 the Atlantic and Indian Oceans. *Micropaleontol. Oceans*, Cambridge University Press, London, 105-149, 1971.
- 426 Bé, A.W.H. and Hutson, W.H.: Ecology of planktonic foraminifera and biogeographic patterns of life and fossil  
427 assemblages in the Indian Ocean. *Micropaleontology*, 23, 369-414, 1977.
- 428 Bé, A.W.H., Harrison, S.M., and Lott, L.: *Orbulina universa* d'Orbigny in the Indian Ocean. *Micropaleontology*,  
429 19, 150-192, 1973.
- 430 Caron, D.A.W., Faber, W., and Bé, A.W.H.: Growth of the spinose planktonic foraminifer *Orbulina universa* in  
431 laboratory culture and the effect of temperature on life processes. *J. Mar. Biolog. Assoc. U.K.*, 67 (2), 343-358,  
432 1987.
- 433 Cléroux, C., Cortijo, E., Anand, P., Labeyrie, L., Bassinot, F., Caillon, N., and Duplessy, J.-C.: Mg/Ca and Sr/Ca  
434 ratios in planktonic foraminifera: Proxies for upper water column temperature reconstruction.  
435 *Paleoceanography*, 23 (3), 2008.
- 436 Cléroux, C., Lynch-Stieglitz, J., Schmidt, M.W., Cortijo, E., and Duplessy, J.-C.: Evidence for calcification depth  
437 change of *Globorotalia truncatulinoides* between deglaciation and Holocene in the western Atlantic Ocean.  
438 *Mar. Micropaleontol.*, 73, 57-61, 2009.
- 439 Colombo, M.R. and Cita, M.B.: Changes in size and test porosity of *Orbulina universa* d'Orbigny in the  
440 Pleistocene record of Cape Bojador (DSDP Site 397, eastern North Atlantic). *Mar. Micropaleontol.*, 5, 13-29,  
441 1980.
- 442 Dekens, P.S., Lea, D.W., Pak, D.K., and Spero, H.J.: Core top calibration of Mg/Ca in tropical foraminifera:  
443 Refining paleotemperature estimation. *Geochem. Geophys. Geosystems*, 3(4), 10.1029/2001GC000200, 2002.
- 444 Deuser, W.G., Ross, E.H., Hemleben, C., and Spindler, M.: Seasonal changes in species composition, numbers,  
445 mass, size and isotopic composition of planktonic foraminifera settling into the deep Sargasso Sea.  
446 *Palaeoceanogr. Palaeoclimatol. Palaeoecol.*, 33, 103-127, 1981.
- 447 Elderfield, H. and Ganssen, G.: Past temperature and  $\delta^{18}\text{O}$  of surface ocean waters inferred from foraminiferal  
448 Mg/Ca ratios. *Nature*, 405 (6785), 442-445, 2000.
- 449 Farmer, E.C., Kaplan, A., de Menocal, P.B., and Lynch-Stieglitz, J.: Corroborating ecological depth preferences  
450 of planktonic foraminifera in the tropical Atlantic with stable oxygen isotope ratios of core-top specimens.  
451 *Paleoceanography*, 22, 1-14, 2007.
- 452 Friedrich, O., Schiebel, R., Wilson, P.A., Weldeab, S., Beer, C.J., Cooper, M.J., and Fiebig, J.: Influence of test  
453 size, water depth and ecology on Mg/Ca, Sr/Ca,  $\delta^{18}\text{O}$  and  $\delta^{13}\text{C}$  in nine modern species of planktic foraminifers.  
454 *Earth Planet. Sci. Lett.*, 319-320, 133-145, 2012.

455 Ganssen, G. and Kroon, D.: The isotopic signature of planktonic foraminifera from NE Atlantic surface sediments:  
456 Implications for the reconstruction of past oceanic conditions. *J. Geol. Soc. London*, 157, 693-699, 2000.

457 Goyet, C, Healy, R, Ryan, J, and Kozyr, A.: Global Distribution of Total Inorganic Carbon and Total Alkalinity  
458 below the Deepest Winter Mixed Layer Depths. United States: N. p., doi:10.2172/760546, 2000.

459 Gray, W. R. and Evans, D.: Nonthermal influences on Mg/Ca in planktonic foraminifera: A review of culture  
460 studies and application to the last glacial maximum. *Paleoceanogr. Paleoclimatol.*, 34, 306–315, <https://doi.org/10.1029/2018PA003517>, 2019.

462 Greenop, R., Hain, M.P., Sosdian, S.M., Oliver, K.I.C., Goodwin, P., Chalk, T.B., Lear, C.H., Wilson, P.A., and  
463 Foster, G.L.: A record of Neogene seawater  $\delta^{11}\text{B}$  reconstructed from paired  $\delta^{11}\text{B}$  analyses on benthic and  
464 planktic foraminifera. *Clim. Past*, 13, 149–170, doi:10.5194/cp-13-149-2017, 2017.

465 Gregor, L. and Gruber, N.: OceanSODA-ETHZ: a global gridded data set of the surface ocean carbonate system  
466 for seasonal to decadal studies of ocean acidification. *Earth Syst. Sci. Data*, 13, 777–808,  
467 <https://doi.org/10.5194/essd-13-777-2021>, 2021.

468 Hamilton, C.P., Spero, H.J., Bijma, J., and Lea, D.W.: Geochemical investigation of gametogenetic calcite  
469 addition in the planktonic foraminifera *Orbulina universa*. *Mar. Micropaleontol.*, 68 (3), 256-267, 2008.

470 Hathorne, E.C., Alard, O., James, R.H., and Rogers, N.W.: Determination of intratest variability of trace elements  
471 in foraminifera by laser ablation inductively coupled plasma-mass spectrometry. *Geochem. Geophys.*  
472 *Geosystems*, 4(12), 8408, doi:10.1029/2003GC000539, 2003.

473 Heaton, T.J., Köhler, P., Butzin, M., Bard, E., Reimer, R.E., Austin, W.E.N., Bronk Ramsey, C., Grootes, P.M.,  
474 Hughen, K.A., Kromer, B., Reimer, P.J., Adkins, J., Burke, A., Cook, M.S., Olsen, J., and Skinner, L.C.:  
475 MARINE20 – The marine radiocarbon age calibration curve (0–55,000 CAL BP). *Radiocarbon*, 62 (4), 779–  
476 820, DOI:10.1017/RDC.2020.68, 2020.

477 Hecht, A.D., Bé, A.W.H., and Lott, L.: Ecologic and paleoclimatic implications of morphologic variation of  
478 *Orbulina universa* in the Indian Ocean. *Science*, 194, 422-424, 1976.

479 Jentzen, A., Nürnberg, D., Hathorne, E.C., and Schönfeld, J.: Mg/ Ca and  $\delta^{18}\text{O}$  in living planktic foraminifers  
480 from the Caribbean, Gulf of Mexico and Florida Straits. *Biogeosciences*, 15 (23), 7077–7095,  
481 <https://doi.org/10.5194/bg-15-7077-2018>, 2018.

482 Jonkers, L. and Kucera, M.: Global analysis of seasonality in the shell flux of extant planktonic foraminifera.  
483 *Biogeosciences*, 12 (7), 2207-2226, 2015.

484 Kisakürek, B., Eisenhauer, A., Böhm, F., Garbe-Schönberg, D., and Erez, J.: Controls on shell Mg/Ca and Sr/Ca  
485 in cultured planktonic foraminifera, *Globigerinoides ruber* (white). *Earth Planet. Sci. Lett.*, 273, 260–269,  
486 doi:10.1016/j.epsl.2008.06.026, 2008.

487 Lea, D.W., Martin, P.A., Chan, D.A., and Spero, H.J.: Calcium uptake and calcification rate in the planktonic  
488 foraminifer *Orbulina universa*. *J. Foram. Res.*, 25, 185-206, 1995.

489 Lea, D.W., Mashiotta, T.A., and Spero, H.J.: Controls on magnesium and strontium uptake in planktonic  
490 foraminifera determined by live culturing. *Geochim. Cosmochim. Acta*, 63 (16), 2369-2379, 1999.

491 Lea, D.W., Pak, D.K., and Spero, H.J.: Climate impact of Late Quaternary equatorial Pacific sea surface  
492 temperature variations. *Science*, 289, 1719-1724, 2000.

493 Locarnini, R.A., Mishonov, A.V., Baranova, O.K., Boyer, T.P., Zweng, M.M., Garcia, H.E., Reagan, J.R., Seidov,  
494 D., Weathers, K.W., Paver, C.R., and Smolyar, I.V.: Temperature. NOAA Atlas NESDIS, in: World Ocean  
495 Atlas 2018 (1), edited by Levitus, S., 2018.

496 Lohmann, G.P. and Schweitzer, P.N.: *Globorotalia truncatulinoides* ' growth and chemistry as probes of the past  
497 thermocline: 1. Shell size. *Paleoceanogr. Paleoclimatol.*, 5 (1), 55-75,  
498 <https://doi.org/10.1029/PA005i001p00055>, 1990.

499 Marshall, B.J., Thunell, R.C., Spero, H.J., Henehan, M.J., Lorenzoni, L., and Astor, Y.: Morphometric and stable  
500 isotopic differentiation of *Orbulina universa* morphotypes from the Cariaco Basin, Venezuela. *Mar.*  
501 *Micropaleontol.*, 10.1016/j.marmicro.2015.08.001, 2015.

502 McConnell, M.C. and Thunell, R.C.: Calibration of the planktonic foraminiferal Mg/Ca paleothermometer:  
503 Sediment trap results from the Guaymas Basin, Gulf of California. *Paleoceanography*, 20, PA2016,  
504 doi:10.1029/2004PA001077, 2005.

505 McKenna, V.S. and Prell, W.L.: Calibration of the Mg/Ca of *Globorotalia truncatulinoides* (R) for the  
506 reconstruction of marine temperature gradients. *Paleoceanography*, 19 (2),  
507 <https://doi.org/10.1029/2000PA000604>, 2004.

508 McKinley, G.A., Fay, A.R., Lovenduski, N.S., and Pilcher, D.J.: Natural Variability and Anthropogenic Trends in  
509 the Ocean Carbon Sink. *Ann. Rev. Mar. Sci.*, 9, 125–50, doi:10.1146/annurev-marine-010816-060529, 2017.

510 Nürnberg, D.: Taking the temperature of past ocean surfaces. *Science*, 289, 1698-1699, 2000.

511 Nürnberg, D., Bijma, J., and Hemleben, C.: Assessing the reliability of magnesium in foraminiferal calcite as a  
512 proxy for water mass temperatures. *Geochim. Cosmochim. Acta*, 60 (5), 803-814, 1996.

513 Nürnberg, D., Riff, T., Bahr, A., Karas, C., Meier, K. and Lippold, J.: Western boundary current in relation to  
514 Atlantic Subtropical Gyre dynamics during abrupt glacial climate fluctuations. *Glob. Planet. Change*, 201, doi:  
515 10.1016/j.gloplacha.2021.103497, 2021.

516 Ravelo, A.C. and Fairbanks, R.G.: Oxygen isotopic composition of multiple species of planktonic foraminifera:  
517 Records of the modern photic zone temperature gradient. *Paleoceanography*, 7, 815-831, 1992.

518 Raven et al.: Ocean acidification due to increasing atmospheric carbon dioxide. The Royal Society. ISBN 0 85403  
519 617 2, [www.royalsoc.ac.uk](http://www.royalsoc.ac.uk), 2005.

520 Regenberg, M., Nürnberg, D., Steph, S., Groeneveld, J., Garbe-Schönberg, D., Tiedemann, R., and Dullo, W.C.:  
521 Assessing the effect of dissolution on planktonic foraminiferal Mg/Ca ratios: Evidence from Caribbean core  
522 tops. *Geochem. Geophys., Geosystems*, 7(7), Q07P15, doi:10.1029/2005GC001019, 2006.

523 Regenberg, M., S. Steph, D. Nürnberg, R. Tiedemann, and Garbe-Schönberg, D.: Calibrating Mg/Ca ratios of  
524 multiple planktonic foraminiferal species with  $\delta^{18}\text{O}$ -calcification temperatures: Paleothermometry for the upper  
525 water column. *Earth Planet. Sci. Lett.*, 278(3), 324-336, 2009.

526 Regenberg, M., Regenberg, A., Garbe-Schönberg, D., and Lea, D.W.: Global dissolution effects on planktonic  
527 foraminiferal Mg/Ca ratios controlled by the calcite-saturation state of bottom waters. *Paleoceanography*, 29  
528 (3), 127–142, 2014.

529 Reynolds, C.E., Richey, J.N., Fehrenbacher, J.S., Rosenheim, B.E., and Spero, H.J.: Environmental controls on  
530 the geochemistry of *Globorotalia truncatulinoides* in the Gulf of Mexico: Implications for paleoceanographic  
531 reconstructions. *Mar. Micropaleontol.*, 142, 92–104, <https://doi.org/10.1016/j.marmicro.2018.05.006>, 2018.

532 Russell, A.D., Hönisch, B., Spero, H.J., and Lea, D.L.: Effects of seawater carbonate ion concentration and  
533 temperature on shell U, Mg, and Sr in cultured planktonic foraminifera. *Geochim. Cosmochim. Acta*, 68 (21),  
534 4347–4361, doi:10.1016/j.gca.2004.03.013, 2004.

535 Sanyal, A., Hemming, N.G., Hanson, G.N., and Broecker, W.S.: Evidence for a higher pH in the glacial ocean  
536 from boron isotopes in foraminifera. *Nature*, 373 (6511), 234–236, 1995.

537 Schiebel, R. and Hemleben, Ch.: Modern planktic foraminifera. *Palaontol. Z.*, 79 (1), 135–148, 2005.

538 Shuttleworth, D., Bostock, H.C., Chalk, T.B., Calvo, E., Jaccard, S.L., Pelejero, C., Martinez-Garcia, A., and  
539 Foster, G.L.: Early deglacial CO<sub>2</sub> release from the Sub-Antarctic Atlantic and Pacific oceans. *Earth Planet. Sci.*  
540 *Lett.*, 554, 116649, <https://doi.org/10.1016/j.epsl.2020.116649>, 2021.

541 Spero, H.J. and Parker, S.L.: Photosynthesis in the symbiotic planktonic foraminifera *Orbulina universa*, and its  
542 potential contribution to oceanic primary productivity. *J. Foraminifera. Res.*, 15, (4), 273–281, 1985.

543 Stuiver, M. and Reimer, P.J.: CALIB rev. 8. *Radiocarbon*, 35, 215–230, 1993.

544 Takahashi, T., Sutherland, S.C., Wanninkhof, R., Colm Sweeney, C., Feely, R.A., Chipman, D.W., Hales, B.,  
545 Friederich, G., Chavez, F., Sabine, C., Watson, A., Bakker, D.C.E, Schuster, U., Metzl, N., Yoshikawa-Inoue,  
546 H., Ishii, M., Midorikawa, T., Nojiri, Y., Körtzinger, A., Steinhoff, T., Hoppema, M., Olafsson, J., Arnarson,  
547 T.S., Tilbrook, B., Johannessen, T., Olsen, A., Bellerby, R, Wong, C.S., Delille, B., Bates, N.R., and de Baar,  
548 H.J.W.: Climatological mean and decadal change in surface ocean pCO<sub>2</sub>, and net sea–air CO<sub>2</sub> flux over the  
549 global oceans. *Deep Sea Res. Part II*, 56, 554–577, doi:10.1016/j.dsr2.2008.12.009, 2009.

550 Tapia, R., Nürnberg, D., Ronge, T., and Tiedemann, R.: Disparities in glacial advection of Southern Ocean  
551 Intermediate Water to the South Pacific Gyre. *Earth Planet. Sci. Lett.*, 410, 152–164,  
552 <http://dx.doi.org/10.1016/j.epsl.2014.11.031>, 2015.

553 Them, T.R., Schmidt, M.W., and Lynch-Stieglitz, J.: Millennial-scale tropical atmospheric and Atlantic Ocean  
554 circulation change from the last Glacial Maximum and Marine Isotope Stage 3. *Earth Planet. Sci. Lett.*, 427,  
555 47–56, 2015.

556 Whitko, N., Hastings, D.W., and Flower, B.P.: Past sea surface temperatures in the tropical South China Sea based  
557 on a new foraminiferal Mg calibration, *J. Mar. Sci.*, 1, doi:MARSci.2002.01.020101, 2002.

558 van der Kaars, S., Miller, G.H., Turney, C.S.M., Cook, J.E., Nürnberg, D., Schönfeld, J., Kershaw, A.P., and  
559 Lehman, S.J.: Human rather than climate the primary cause of Pleistocene megafaunal extinction in Australia.  
560 *Nat. Commun.*, 8, 14142, <https://doi.org/10.1038/ncomms14142>, 2017.

561
